# Supplementary material
Source: publisher site journal article supplement (https://www.dovepress.com/article/490487)
Supplement: Supplementary file 1 [file get_supplementary_file.php]

Table S1 Baseline characteristics of family members between the development group and validation group

| Variables | Development Group  （n=432） | Validation Group  （n=135） | P*-*value |
| --- | --- | --- | --- |
| **General data of family members** |  |  |  |
| Age [years, *M (P*25, *P*75)] | 46.00(36.00,59.00) | 45.00(38.00,56.00) | 0.454 |
| Gender (n, %) |  |  | 0.481 |
| Male | 209 (48.38) | 70(51.85) |  |
| Female | 223 (51.62) | 65(48.15) |  |
| Education (n, %) |  |  | 0.657 |
| Primary school and below | 69 (15.97) | 16(11.85) |  |
| Junior high school | 127 (29.40) | 44(32.59) |  |
| High school/vocational school | 112 (25.93) | 37(27.41) |  |
| College or above | 124 (28.70) | 38(28.15) |  |
| Work status (n, %) |  |  | 0.045 |
| Employed | 275 (63.66) | 93(68.89) |  |
| Unemployed | 141 (32.64) | 32(23.70) |  |
| Retire | 16 (3.70) | 10(7.41) |  |
| Marital status (n, %) |  |  | 0.173 |
| Married | 367 (84.95) | 108(80.00) |  |
| Divorced/ Widowed | 65 (15.05) | 27(20.00) |  |
| Relationship with patients (n, %) |  |  | 0.226 |
| Spouse | 151 (34.95) | 35(25.93) |  |
| Children | 221 (51.16) | 82(60.74) |  |
| Parents | 26 (6.02) | 8(5.93) |  |
| Others | 34 (7.87) | 10(7.40) |  |
| Family per capita monthly income (n, %) |  |  | 0.994 |
| Less than 1000 | 72 (16.67) | 22(16.30) |  |
| 1000~3000 | 129 (29.86) | 42(31.11) |  |
| 3001~5000 | 146 (33.80) | 45(33.33) |  |
| More than 5000 | 85 (19.68) | 26(19.26) |  |
| Patient care experience (n, %) |  |  | 0.135 |
| Yes | 175 (40.51) | 45(33.33) |  |
| No | 257 (59.49) | 90(66.66) |  |
| History of mental illness (n, %) |  |  | 0.020 |
| Yes | 34 (7.87) | 3(2.22) |  |
| No | 398 (92.13) | 132(97.78) |  |
| Location of residence (n, %) |  |  | 0.495 |
| Rural area | 248(57.41) | 73(54.07) |  |
| Urban area | 184(42.59) | 62(45.93) |  |
| **General data of patients** |  |  |  |
| Age[years, *M(P*25, *P*75)] | 63.00(57.00,69.00) | 64.00(54.00,70.00) | 0.797 |
| Gender (n, %) |  |  | 0.032 |
| Male | 287 (66.44) | 76(56.30) |  |
| Female | 145 (33.56) | 59(43.70) |  |
| Admission method (n, %) |  |  | 0.083 |
| Admitted from the emergency | 217 (50.23) | 84(62.22) |  |
| Transfer from ward | 75 (17.36) | 19(14.07) |  |
| Postoperative transfer | 69 (15.97) | 13(9.63) |  |
| Outpatient admission | 71 (16.44) | 19(14.08) |  |
| APACHE II score [score, *M (P*25, *P*75)] | 18.00(13.00,22.00) | 18.00(13.00,23.00) | 0.576 |
| Length of ICU stay [day, *M (P*25, *P*75)] | 10.00(6.00,13.75) | 10.00(6.00,14.00) | 0.358 |
| First check-in to ICU (n, %) |  |  | 0.121 |
| Yes | 324 (75.00) | 110(81.48) |  |
| No | 108 (25.00) | 25(18.52) |  |
| Payment method (n, %) |  |  | ＜0.001 |
| Self-funded | 87 (20.14) | 37(27.41) |  |
| Urban employee medical insurance | 75 (17.36) | 25(18.52) |  |
| Resident medical insurance | 256 (59.26) | 52(38.52) |  |
| Others | 14 (3.24) | 21(15.55) |  |
| PSSS score [score, *M (P*25, *P*75)] | 56.50(47.00,68.00) | 58.00(47.00,65.00) | 0.893 |

**Notes**: Family per capita monthly income, RMB/month.

**Abbreviations**: n(%), number (percentage); *M (P*25, *P*75), Median (first quantile, third quantile); APACHE II, Acute Physiology and Chronic Health Evaluation II; PSSS, Perceived Social Support Scale.
